# Supplementary material
Source: MDPI journal article supplement (https://www.mdpi.com/2073-4344/13/4/769)
Supplement: s1 [file s1]

## Supporting Information

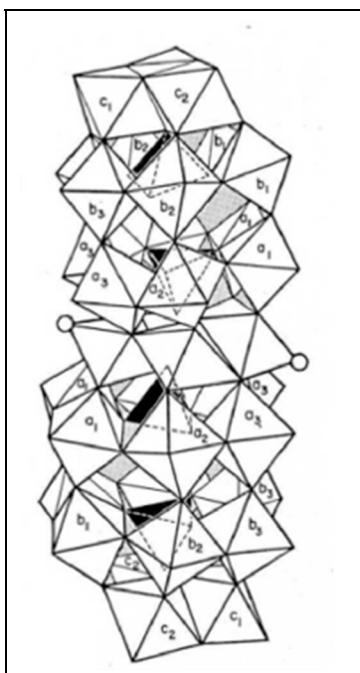

**Figure S1.** The structure of  $\text{Cu}_4\text{P}_4\text{W}_{30}$ .<sup>[23]</sup>

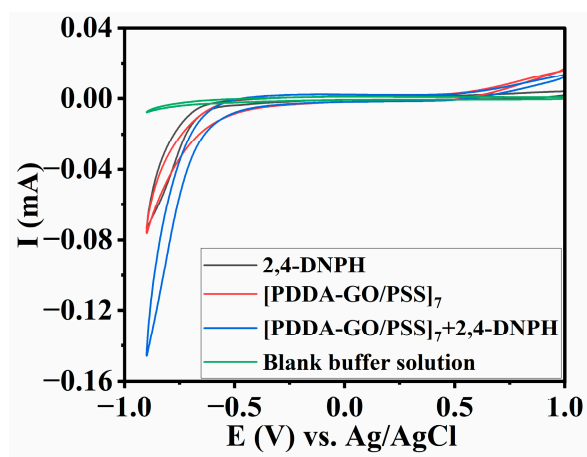

**Figure S2.** CVs of bare ITO in blank buffer solution at pH 7 (green curve), 2,4-DNPH (10  $\mu\text{M}$ , black curve) and the electrode ITO/[PDDA-GO/PSS]<sub>7</sub> in blank buffer solution (red curve), 2,4-DNPH (blue curve) (pH 7) with scan rate of 50  $\text{mV}\cdot\text{s}^{-1}$ .

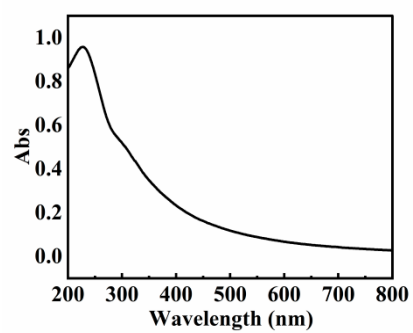

**Figure S3.** UV-vis absorption spectrum of GO dispersion.
